# Supplementary material
Source: Springer Nature journal article supplement (https://www.springermedizin.de/resource/supplementary/13099_2013_114_MOESM1_ESM.pdf/9665576)

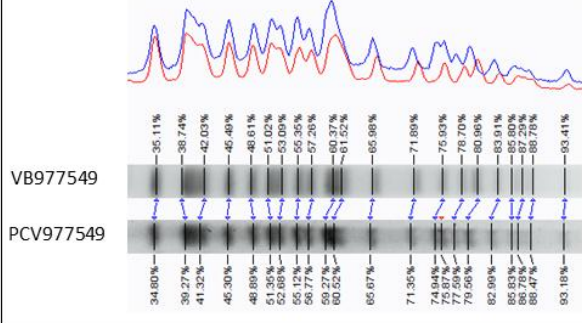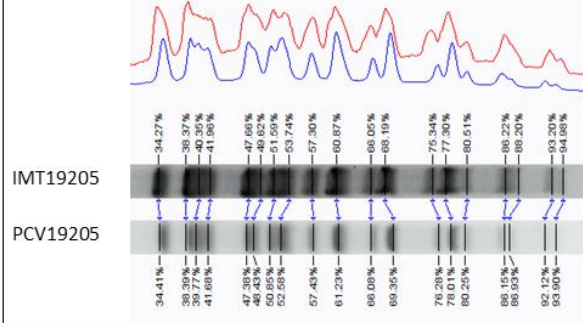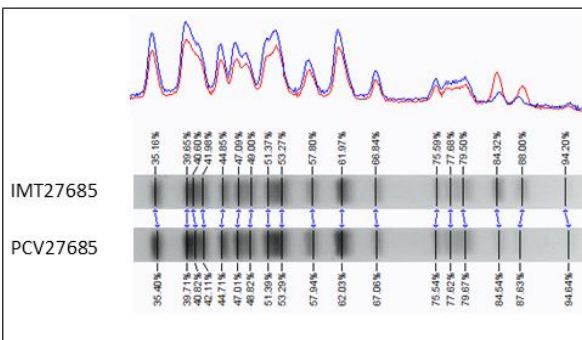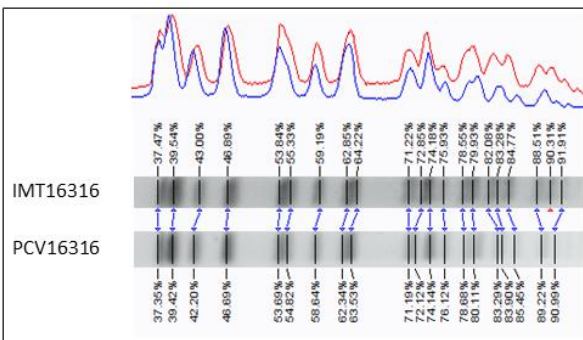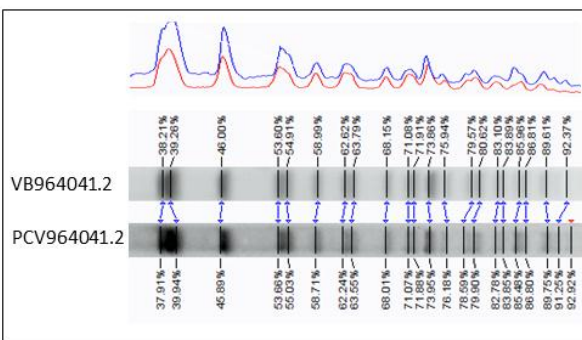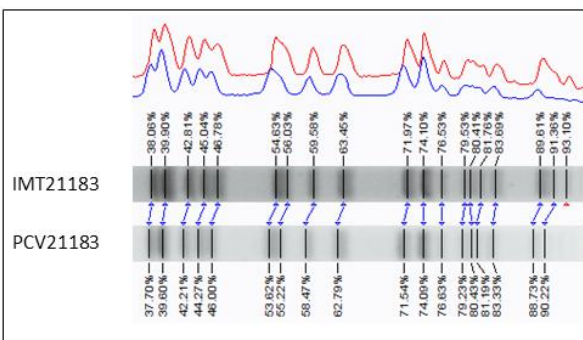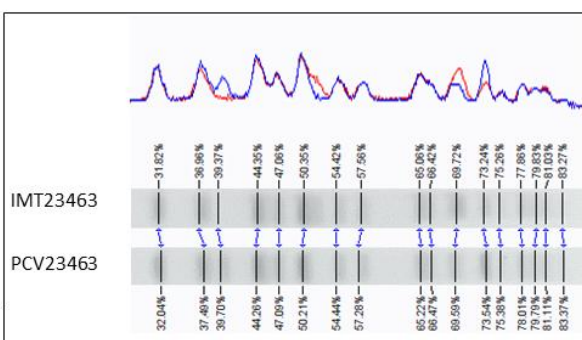

Supplement: MOESM1 [file 9665576]
